# Supplementary material for: Unveiling multifunctional inhibitors: holistic spectral, electronic and molecular characterization, coupled with biological profiling of substituted pyridine derivatives againstLD transpeptidase,heme oxygenaseandPPAR gamma
Source: Royal Society of Chemistry journal article supplement (doi:10.1039/d4ra04217d), 2024-01-01
Supplement: d4ra04217d1.pdf [file d4ra04217d1.pdf]

## SUPPLEMENTARY FILE

### Unveiling Multifunctional Inhibitors: Holistic Spectral, Electronic and Molecular Characterization Coupled with Biological Profiling of Substituted Pyridine Derivatives Against LD Transpeptidase, Heme Oxygenase and PPAR Gamma

Shaik Yasmin Begum<sup>a</sup>, Predhanekar Mohamed Imran<sup>a,\*</sup>, Attar Kubaib<sup>a,\*</sup>, Mohamed Taha  
Yassin<sup>b</sup>, Fatimah O. Al-Otibi<sup>b</sup>, M. Selvakumaran<sup>a</sup>, A. Aathif Basha<sup>c</sup>,  
S. Sulthanudeen<sup>a</sup>

<sup>a</sup>Department of Chemistry, Islamiah College (Autonomous), Vaniyambadi - 635752, Tamilnadu,  
India. (Affiliated to Thiruvalluvar University, Serkkadu, Vellore – 632115, Tamilnadu, India)

<sup>b</sup>Department of Botany and Microbiology, College of Science, King Saud University, P.O. Box  
2455, Riyadh 11451, Saudi Arabia

<sup>c</sup>Department of Physics, Islamiah College (Autonomous), Vaniyambadi - 635752, Tamilnadu,  
India. (Affiliated to Thiruvalluvar University, Serkkadu, Vellore – 632115, Tamilnadu, India)

Figure S1. Chemical structure of 3-Phenyl-1-(Pyridine-4-Carbonyl)-1H-Pyrazole-4-Carboxylic  
Acid (PPP), 3-(4-Acetophenyl)-1-(Pyridine-4-Carbonyl)-1H-Pyrazole-4-Carboxylic Acid (APP)  
and 3-(4-Methylphenyl)-1-(Pyridine-4-Carbonyl)-1H-Pyrazole-4-Carboxylic Acid (MPP)  
derivatives

Figure S2. NMR and mass spectrometry data for all derivatives, obtained through experimental

Figure S3. The binding interactions of compound PPP against LD Transpeptidase (PDB ID:  
4JMN), Heme Oxygenase (PDB ID: 1IW0) and PPAR Gamma (PDB ID: 2ZNO)

Figure S4. The binding interactions of compound MPP against LD Transpeptidase (PDB ID:  
4JMN), Heme Oxygenase (PDB ID: 1IW0) and PPAR Gamma (PDB ID: 2ZNO)

Table S5. Comprehensive Physicochemical, Medicinal Chemistry, Absorption, Distribution,  
Metabolism, Excretion and Toxicity Profiles of Compounds PPP, APP and MPP

\*Corresponding authors: [imranpkm@gmail.com](mailto:imranpkm@gmail.com), [attar.kubaib@gmail.com](mailto:attar.kubaib@gmail.com)

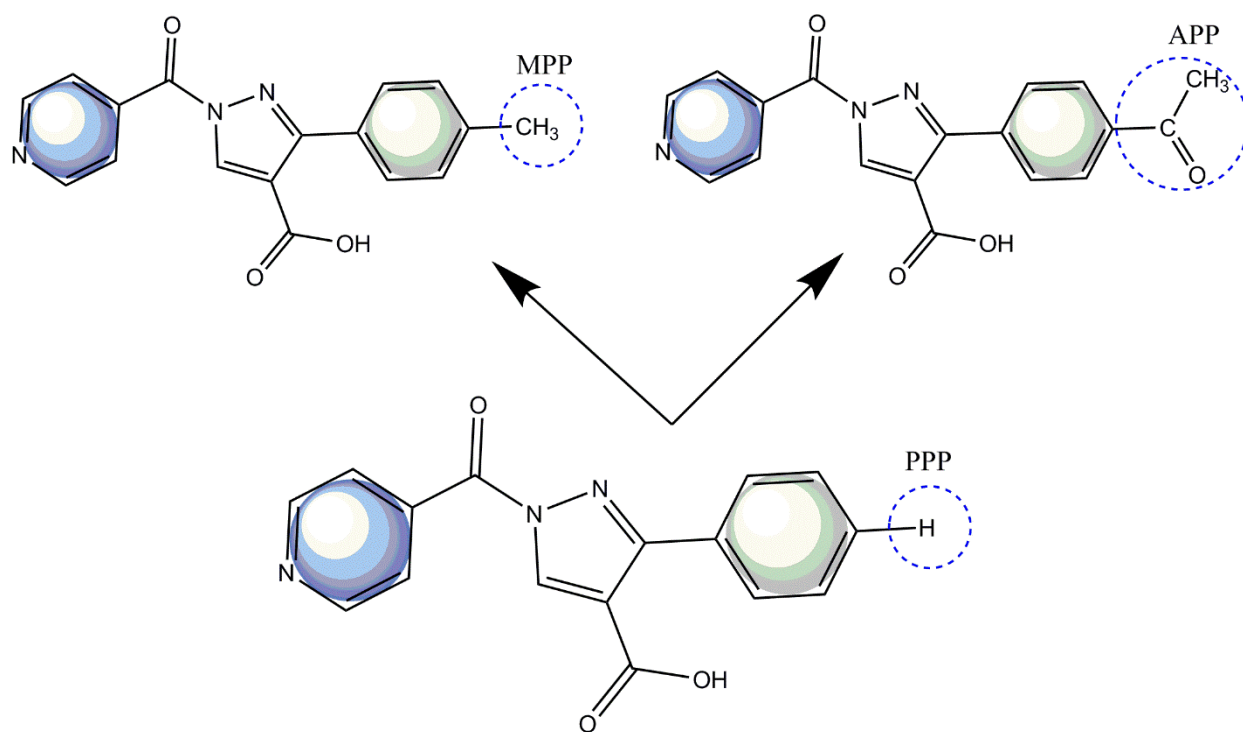

Figure S1. Chemical structure of 3-Phenyl-1-(Pyridine-4-Carbonyl)-1H-Pyrazole-4-Carboxylic Acid (PPP), 3-(4-Acetophenyl)-1-(Pyridine-4-Carbonyl)-1H-Pyrazole-4-Carboxylic Acid (APP) and 3-(4-Methylphenyl)-1-(Pyridine-4-Carbonyl)-1H-Pyrazole-4-Carboxylic Acid (MPP) derivatives

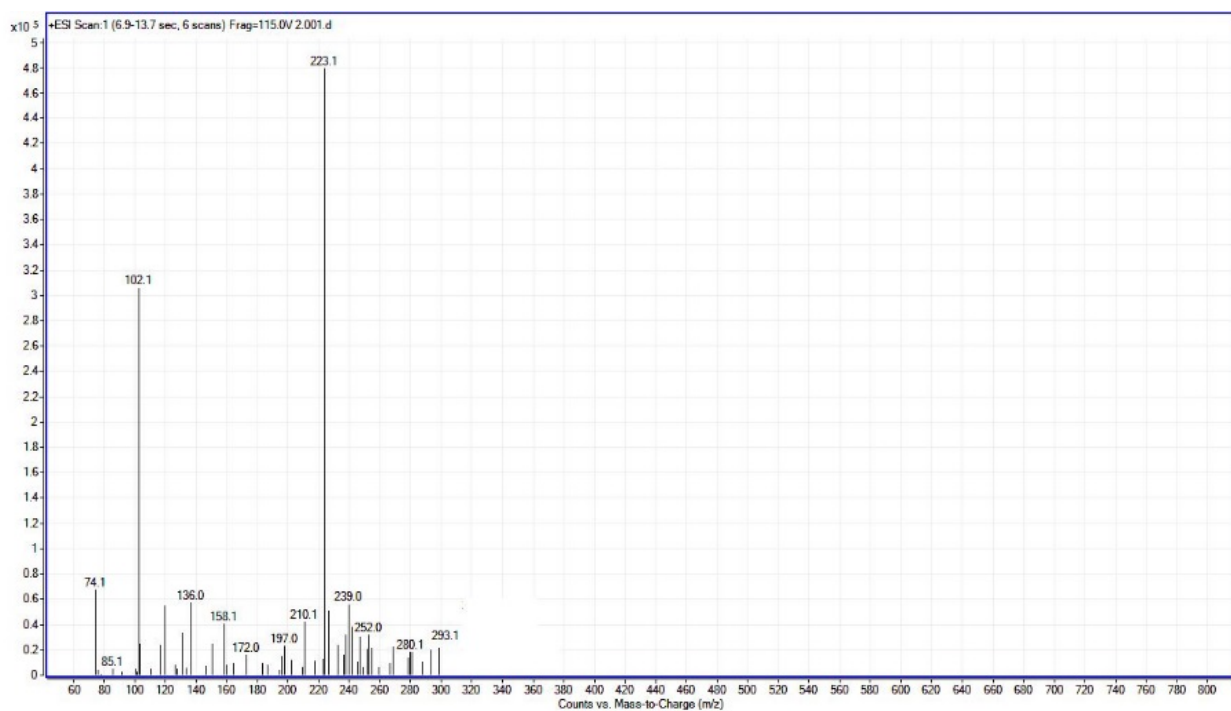

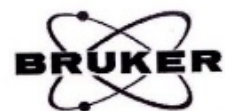

Current Data Parameters  
NAME 2  
EXPNO 1  
PROCNO 1

F2 - Acquisition Parameters  
Date\_ 20221215  
Time 10.09  
INSTRUM spect  
PROBHD 5 mm BBO BB-1H  
PULPROG zg30  
TD 65536  
SOLVENT DMSO  
NS 16  
DS 2  
SWH 8250.825 Hz  
FIDRES 0.125898 Hz  
AQ 3.9715922 sec  
RG 238  
DW 60.600 usec  
DE 6.00 usec  
TE 300.0 K  
D1 2.00000000 sec  
TDO 1

----- CHANNEL f1 -----  
NUC1 1H  
P1 10.50 usec  
PL1 -2.00 dB  
SFO1 400.1324710 MHz

F2 - Processing parameters  
SI 32768  
SF 400.1300090 MHz  
WDW EM  
SSB 0  
LB 0.30 Hz  
GB 0  
PC 1.00

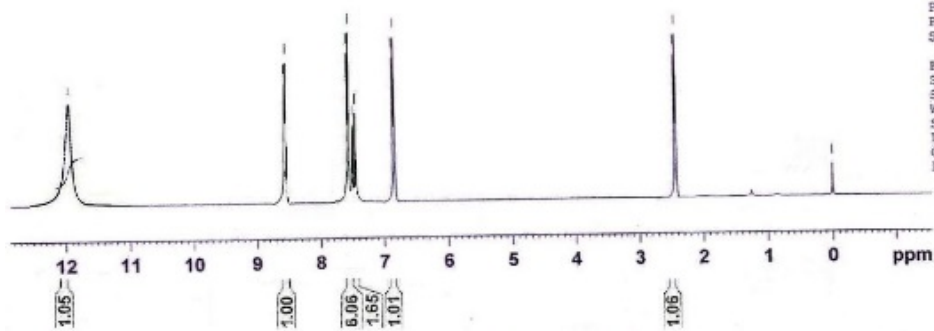

(a)

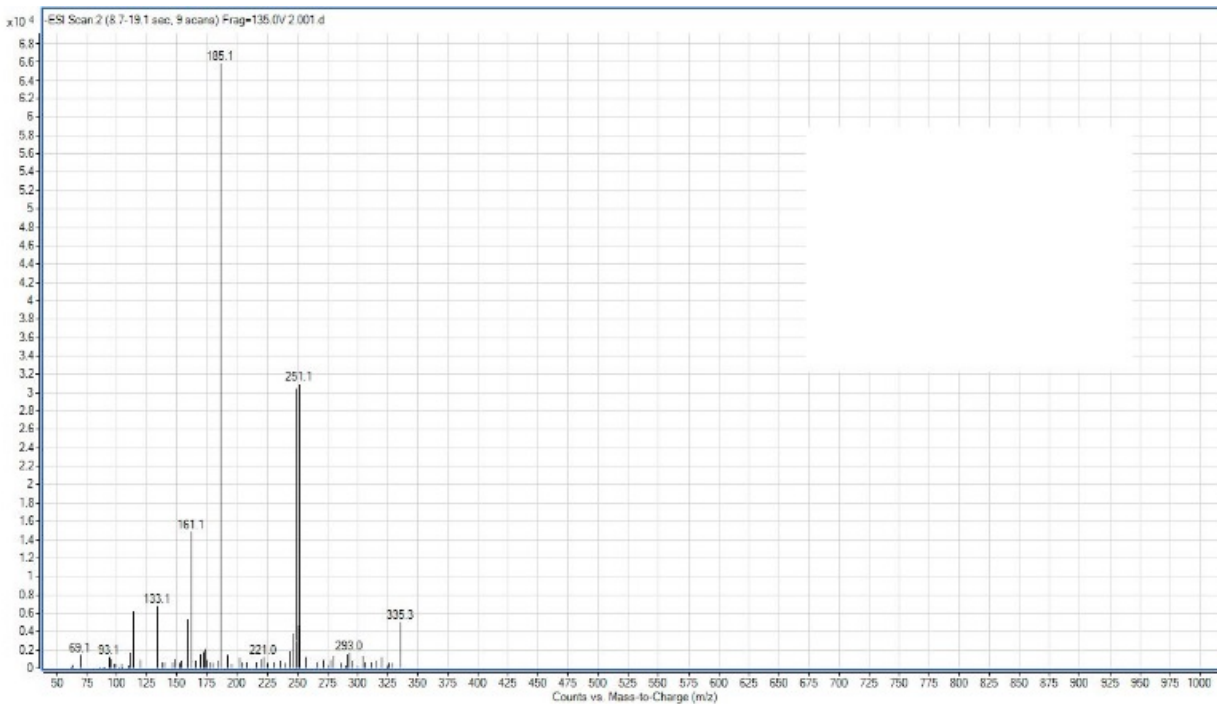

Current Data Parameters  
 NAME Dec16-2022  
 EXPNO 25  
 PROCNO 1

F2 - Acquisition Parameters  
 Date\_ 20221215  
 Time 23.32  
 INSTRUM spect  
 PROBHD 5 mm PABBO BB-  
 PULPROG zg30  
 TD 32768  
 SOLVENT MeOD  
 NS 32  
 DS 2  
 SWH 10330.578 Hz  
 FIDRES 0.315264 Hz  
 AQ 1.5860212 sec  
 RG 203  
 DW 48.400 usec  
 DE 6.50 usec  
 TE 298.1 K  
 D1 1.0000000 sec  
 TDO 1

===== CHANNEL f1 =====  
 NUC1 1H  
 P1 10.65 usec  
 PL1 0.00 dB  
 PL1W 23.53637305 W  
 SFO1 500.1330885 MHz

F2 - Processing parameters  
 SI 32768  
 SF 500.1300500 MHz  
 WDW EM  
 SSB 0  
 LB 0.30 Hz  
 GB 0  
 PC 1.00

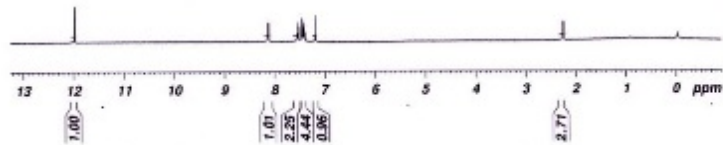

(b)

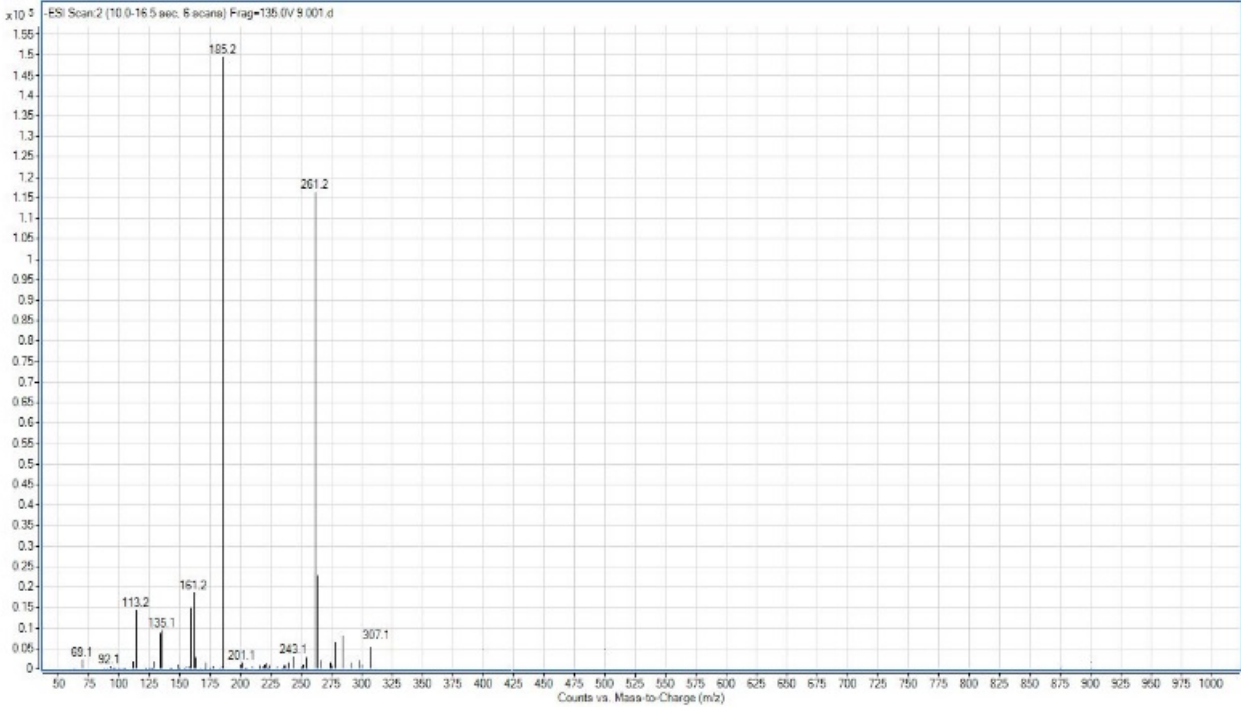

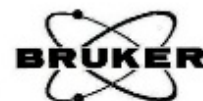

Current Data Parameters  
NAME : 1  
EXPNO : 1  
PROCNO : 1

F2 - Acquisition Parameters  
Date\_ : 20221215  
Time : 10.00  
INSTRUM : spect  
PROBHD : 5 mm BBO BB-1H  
PULPROG : zg30  
TC : 85.56  
SCANS : 6400  
MS : 15  
DS : 2  
SHE : 9270.075 Hz  
F1RES : 0.125898 Hz  
AQ : 3.9715922 sec  
RG : 278  
LW : 60.600 usec  
DS : 8.00 usec  
TE : 300.0 K  
D1 : 2.0000000 sec  
Y20 : 1

----- CHANNEL f1 -----  
NUC1 : 1H  
P1 : 10.50 usec  
PT1 : 2.00 dB  
SFO1 : 400.1324710 MHz

F2 - Processing parameters  
SI : 32768  
SF : 400.1300990 MHz  
WDW : EM  
SSB : 0  
LB : 0.70 Hz  
GB : 0  
PC : 1.00

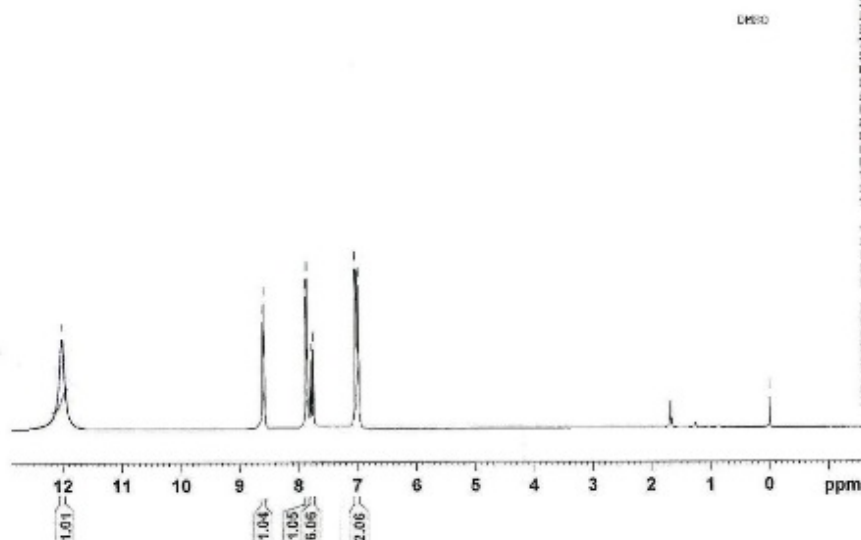

(c)

Figure S2. NMR and mass spectrometry data for all derivatives (a) PPP, (b) APP, (c) MPP, obtained through experimental

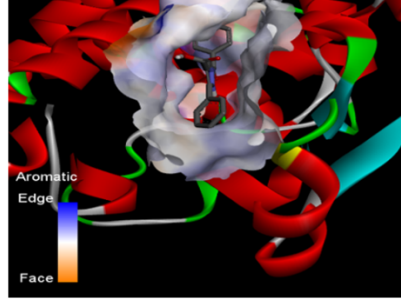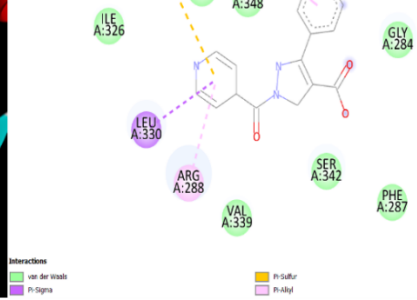

PDB ID : 1IW0

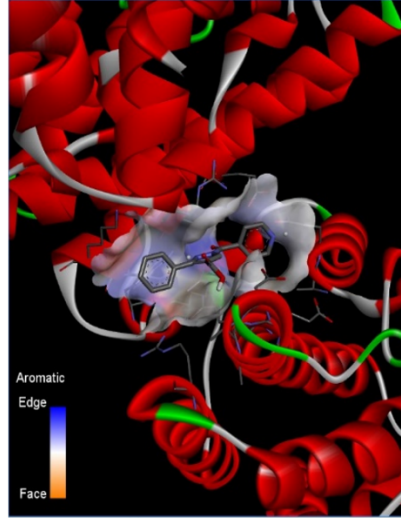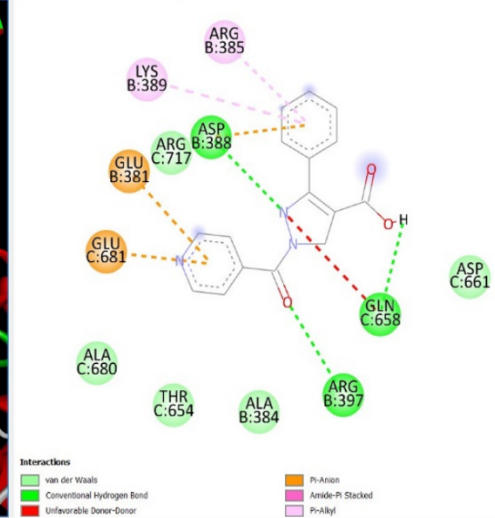

PDB ID : 4JMN

Figure S3. The binding in **LD Transpeptidase** (PDB ID: 4JMN), **Heme Oxygenase** (PDB ID: 1IW0), and **Gamma** (PDB ID: 2ZNO)

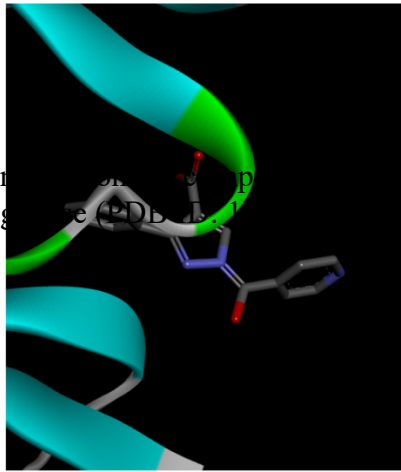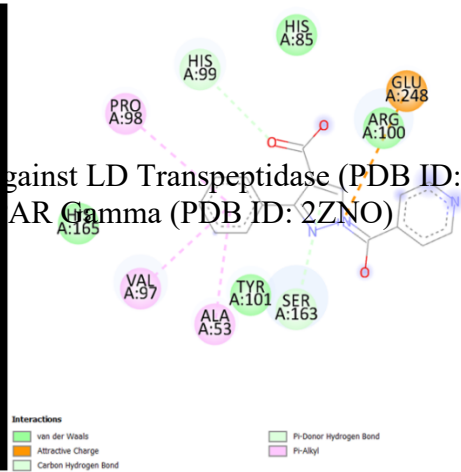

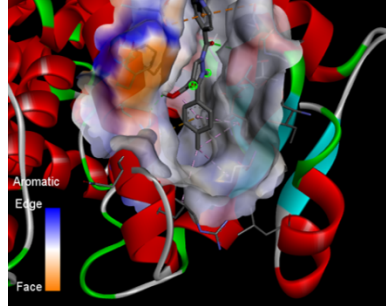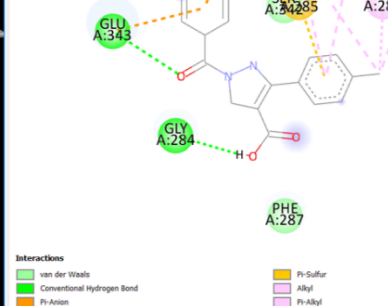

PDB ID : 1IW0

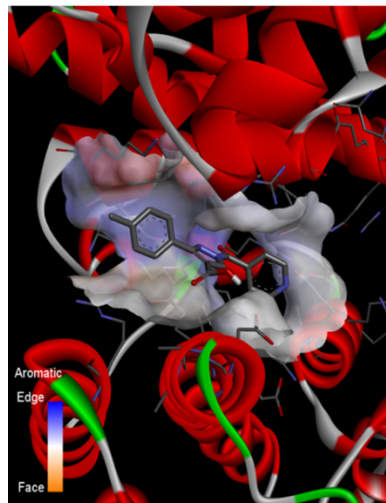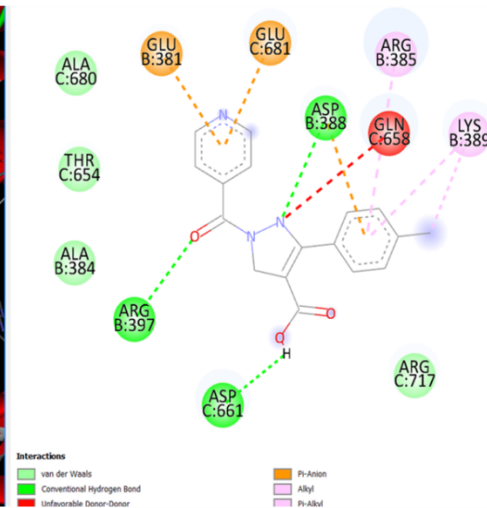

PDB ID : 4JMN

Figure S4. The binding interaction of compound MPP against LD Transpeptidase (PDB ID: 4JMN), Heme Oxygenase 1 (PDB ID: 1IW0) and PAR Gamma (PDB ID: 6ZNO).

Table S5. Comprehensive Physicochemical Medicines Chemistry, Absorption, Distribution, Metabolism, Excretion and Toxicology profiles of compounds PPP, APP and MPP

| Property         | PPP | APP | MPP | Values                                               |
|------------------|-----|-----|-----|------------------------------------------------------|
| Molecular Weight | 293 | 305 | 307 | Contain hydrogen atoms.<br>Optimal:100~600           |
| Volume           | 293 | 305 | 310 | Van der Waals volume                                 |
| Density          | 1   | 1   | 1   | Density = MW / Volume                                |
| nHA              | 6   | 7   | 6   | Number of hydrogen bond acceptors.<br>Optimal:0~12   |
| nHD              | 1   | 1   | 1   | Number of hydrogen bond donors.<br>Optimal:0~7       |
| nRot             | 4   | 5   | 4   | Number of rotatable bonds.<br>Optimal:0~11           |
| nRing            | 1   | 1   | 1   | Number of rings. Optimal:0~6                         |
| MaxRing          | 6   | 6   | 6   | Number of atoms in the biggest ring.<br>Optimal:0~18 |
| nHet             | 6   | 7   | 6   | Number of heteroatoms. Optimal:1~15                  |

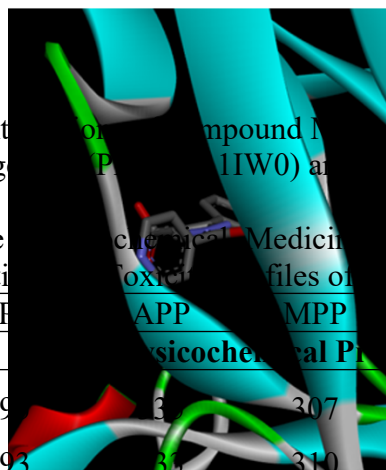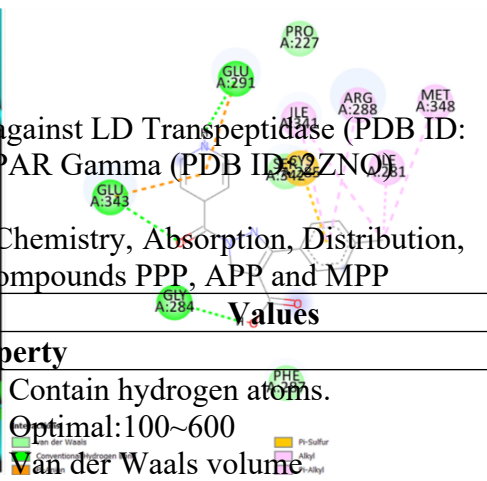

|                |        |        |        |                                                                                                                                                                                                   |
|----------------|--------|--------|--------|---------------------------------------------------------------------------------------------------------------------------------------------------------------------------------------------------|
| fChar          | 0.0    | 0.0    | 0.0    | Formal charge. Optimal:-4 ~4                                                                                                                                                                      |
| nRig           | 19     | 20     | 19     | Number of rigid bonds. Optimal:0~30                                                                                                                                                               |
| Flexibility    | 0.0    | 0.30   | 0.20   | Flexibility = nRot /nRig                                                                                                                                                                          |
| Stereo Centers | 0.0    | 0.0    | 0.0    | Stereo Centers. Optimal: 2                                                                                                                                                                        |
| TPSA           | 85.00  | 102.15 | 85.08  | Topological Polar Surface Area.<br>Optimal:0~140                                                                                                                                                  |
| logS           | -3.00  | -3.70  | -4.41  | The logarithm of aqueous solubility value.                                                                                                                                                        |
| logP           | 1.27   | 1.32   | 1.98   | The logarithm of the n-octanol/water distribution coefficients at pH=7.4.                                                                                                                         |
| logD           | 1.49   | 1.55   | 1.86   | The logarithm of the n-octanol/water distribution coefficient.                                                                                                                                    |
| pka (Acid)     | 3.55   | 4.09   | 4.04   | Acid-base dissociation constant (pKa) value represents the strength of a drug molecule's acidity or basicity.                                                                                     |
| pka (Base)     | 1.26   | 1.53   | 1.65   | Acid-base dissociation constant (pKa) value represents the strength of a drug molecule's acidity or basicity.                                                                                     |
| Melting point  | 230.94 | 250.84 | 247.79 | The predicted melting point of a compound is expressed in degrees Celsius (°C).<br>Melting points below 25°C are classified as liquids, while melting points above 25°C are classified as solids. |
| Boiling point  | 323.65 | 305.95 | 293.70 | The predicted melting point of a compound is expressed in degrees Celsius (°C).<br>A normal boiling point below 25°C is categorized as a gas.                                                     |

## 2. Medicinal Chemistry

|       |      |      |      |                                                                                                                                                                                                                                                                                         |
|-------|------|------|------|-----------------------------------------------------------------------------------------------------------------------------------------------------------------------------------------------------------------------------------------------------------------------------------------|
| QED   | 0.80 | 0.74 | 0.80 | <ul style="list-style-type: none"> <li>■ A measure of drug-likeness based on the concept of desirability;</li> <li>■ Attractive: &gt; 0.67;</li> <li>■ unattractive: 0.49~0.67;</li> <li>■ too complex: &lt; 0.34</li> <li>■ ES: Easy to synthesize; HS: Hard to synthesize;</li> </ul> |
| GASA  | 0.0  | 0.0  | 0.0  | <ul style="list-style-type: none"> <li>■ The output value represents the probability of being difficult to synthesize, ranging from 0 to 1.</li> <li>■ Synthetic accessibility score is designed to estimate ease of synthesis of drug-like molecules.</li> </ul>                       |
| Synth | 2.0  | 2.0  | 2.0  | <ul style="list-style-type: none"> <li>■ SAscore ≥ 6, difficult to synthesize;</li> <li>■ SAscore &lt;6, easy to synthesize</li> </ul>                                                                                                                                                  |



|                       |          |          |          |                                                                                                                                                                                                                                                                                           |
|-----------------------|----------|----------|----------|-------------------------------------------------------------------------------------------------------------------------------------------------------------------------------------------------------------------------------------------------------------------------------------------|
| Fsp3                  | 0.0      | 0.056    | 0.059    | <ul style="list-style-type: none"> <li>■ The number of sp<sup>3</sup> hybridized carbons / total carbon count, correlating with melting point and solubility.</li> <li>■ Fsp3 0.42 is considered a suitable value.</li> </ul>                                                             |
| MCE-18                | 16.0     | 18.0     | 17.0     | <ul style="list-style-type: none"> <li>■ MCE-18 stands for medicinal chemistry evolution.</li> <li>■ MCE-18 45 is considered a suitable value.</li> </ul>                                                                                                                                 |
| NPscore               | -1.01    | -0.91    | -1.07    | <ul style="list-style-type: none"> <li>■ Natural product-likeness score.</li> <li>■ This score is typically in the range from -5 to 5.</li> <li>■ The higher the score is, the higher the probability is that the molecule is a NP.</li> <li>■ MW 500; logP 5; Hacc 10; Hdon 5</li> </ul> |
| Lipinski Rule         | 0.0      | 0.0      | 0.0      | <ul style="list-style-type: none"> <li>■ If two properties are out of range, a poor absorption or permeability is possible, one is acceptable.</li> <li>■ logP &gt; 3; TPSA &lt; 75</li> </ul>                                                                                            |
| Pfizer Rule           | 0.0      | 0.0      | 0.0      | <ul style="list-style-type: none"> <li>■ Compounds with a high log P (&gt;3) and low TPSA (&lt;75) are likely to be toxic.</li> <li>■ MW 400; logP 4</li> </ul>                                                                                                                           |
| GSK Rule              | 0.0      | 0.0      | 0.0      | <ul style="list-style-type: none"> <li>■ Compounds satisfying the GSK rule may have a more favorable ADMET profile</li> <li>■ 200 MW 500; -2 logD 5</li> </ul>                                                                                                                            |
| Golden Triangle       | 0.0      | 0.0      | 0.0      | <ul style="list-style-type: none"> <li>■ Compounds satisfying the Golden Triangle rule may have a more favorable ADMET profile.</li> </ul>                                                                                                                                                |
| PAINS                 | 0 alerts | 0 alerts | 0 alerts | <ul style="list-style-type: none"> <li>■ frequent hitters, Alpha-screen artifacts and reactive compound 480 substructures (J Med Chem 201053:2719-40)</li> </ul>                                                                                                                          |
| ALARM NMR             | 0 alerts | 0 alerts | 0 alerts | <ul style="list-style-type: none"> <li>■ Thiol reactive compounds.</li> </ul>                                                                                                                                                                                                             |
| BMS                   | 0 alerts | 0 alerts | 0 alerts | <ul style="list-style-type: none"> <li>■ undesirable, reactive compounds 176 substructures (J Chem Inf Model 200646:1060-8)</li> </ul>                                                                                                                                                    |
| Chelator Rule         | 0 alerts | 0 alerts | 0 alerts | <ul style="list-style-type: none"> <li>■ Chelating compounds.</li> </ul>                                                                                                                                                                                                                  |
| Colloidal aggregators | 0.01     | 0.04     | 0.05     | <ul style="list-style-type: none"> <li>■ Category 0: non-colloidal aggregators;</li> <li>■ Category 1: colloidal aggregators.</li> <li>■ The output value is the probability of being colloidal aggregators, within the range of 0 to 1.</li> </ul>                                       |
| FLuc inhibitors       | 0.17     | 0.27     | 0.34     | <ul style="list-style-type: none"> <li>■ Category 0: non-fLuc inhibitors;</li> </ul>                                                                                                                                                                                                      |

|                       |      |      |      |                                                                                                                                                                                                                                                                                                                                                                                                                                                                                                                                                                                                                                                                                                                                                                                                                                                                                                                                                                                               |
|-----------------------|------|------|------|-----------------------------------------------------------------------------------------------------------------------------------------------------------------------------------------------------------------------------------------------------------------------------------------------------------------------------------------------------------------------------------------------------------------------------------------------------------------------------------------------------------------------------------------------------------------------------------------------------------------------------------------------------------------------------------------------------------------------------------------------------------------------------------------------------------------------------------------------------------------------------------------------------------------------------------------------------------------------------------------------|
| Blue fluorescence     | 0.16 | 0.24 | 0.22 | <ul style="list-style-type: none"> <li>■ Category 1: fLuc inhibitors.</li> <li>■ The output value is the probability of being fLuc inhibitors, within the range of 0 to 1.</li> <li>■ Category 0: non-blue fluorescence;</li> <li>■ Category 1: blue fluorescence.</li> <li>■ The output value is the probability of being blue fluorescence, within the range of 0 to 1.</li> <li>■ Category 0: non-green fluorescence;</li> <li>■ Category 1: green fluorescence.</li> <li>■ The output value is the probability of being green fluorescence, within the range of 0 to 1.</li> <li>■ Category 0: non-reactive compound;</li> <li>■ Category 1: reactive compound.</li> <li>■ The output value is the probability of being reactive compound, within the range of 0 to 1.</li> <li>■ Category 0: non-promiscuous compound;</li> <li>■ Category 1: promiscuous compound.</li> <li>■ The output value is the probability of being promiscuous compound, within the range of 0 to 1.</li> </ul> |
| Green fluorescence    | 0.25 | 0.35 | 0.35 |                                                                                                                                                                                                                                                                                                                                                                                                                                                                                                                                                                                                                                                                                                                                                                                                                                                                                                                                                                                               |
| Reactive compounds    | 0.03 | 0.01 | 0.01 |                                                                                                                                                                                                                                                                                                                                                                                                                                                                                                                                                                                                                                                                                                                                                                                                                                                                                                                                                                                               |
| Promiscuous compounds | 0.01 | 0.05 | 0.03 |                                                                                                                                                                                                                                                                                                                                                                                                                                                                                                                                                                                                                                                                                                                                                                                                                                                                                                                                                                                               |

### 3. Absorption

|                     |       |       |       |                                                                                                                                                                                                                                                                                                                                                                                                                                                                                                                                                                                                                                                                                                                                            |
|---------------------|-------|-------|-------|--------------------------------------------------------------------------------------------------------------------------------------------------------------------------------------------------------------------------------------------------------------------------------------------------------------------------------------------------------------------------------------------------------------------------------------------------------------------------------------------------------------------------------------------------------------------------------------------------------------------------------------------------------------------------------------------------------------------------------------------|
| Caco-2 Permeability | -5.12 | -4.95 | -4.60 | <p>Optimal: higher than -5.15 Log unit</p> <ul style="list-style-type: none"> <li>■ low permeability: <math>&lt; 2 \times 10^{-6}</math> cm/s</li> <li>■ medium permeability: <math>2-20 \times 10^{-6}</math> cm/s</li> <li>■ high passive permeability: <math>&gt; 20 \times 10^{-6}</math> cm/s</li> <li>■ The experimental data for Peff was logarithmically transformed (logPeff).</li> <li>■ Molecules with log Peff values below 2.0 were classified as low-permeability (Category 0), while those with log Peff values exceeding 2.5 were classified as high-permeability (Category 1).</li> <li>■ Category 1: Inhibitor;</li> <li>■ Category 0: Non-inhibitor;</li> <li>■ The output value is the probability of being</li> </ul> |
| MDCK Permeability   | -4.60 | -4.76 | -4.70 |                                                                                                                                                                                                                                                                                                                                                                                                                                                                                                                                                                                                                                                                                                                                            |
| PAMPA               | 0.98  | 0.98  | 0.99  |                                                                                                                                                                                                                                                                                                                                                                                                                                                                                                                                                                                                                                                                                                                                            |
| Pgp-inhibitor       | 0.02  | 0.02  | 0.04  |                                                                                                                                                                                                                                                                                                                                                                                                                                                                                                                                                                                                                                                                                                                                            |

|                        |       |       |       |                                                                                                                                                                                                                                                                 |
|------------------------|-------|-------|-------|-----------------------------------------------------------------------------------------------------------------------------------------------------------------------------------------------------------------------------------------------------------------|
| Pgp-substrate          | 0.02  | 0.04  | 0.03  | <p>Pgp-inhibitor</p> <ul style="list-style-type: none"> <li>■ Category 1: substrate;</li> <li>■ Category 0: Non-substrate;</li> <li>■ The output value is the probability of being</li> </ul>                                                                   |
| HIA                    | 0.00  | 0.01  | 0.00  | <p>Pgp-substrate</p> <ul style="list-style-type: none"> <li>■ Human Intestinal Absorption</li> <li>■ Category 1: HIA+( HIA &lt; 30%);</li> <li>■ Category 0: HIA-( HIA &gt;= 30%);</li> <li>■ The output value is the probability of being HIA+</li> </ul>      |
| F20%                   | 0.01  | 0.01  | 0.02  | <ul style="list-style-type: none"> <li>■ 20% Bioavailability</li> <li>■ Category 1: F 20% + (bioavailability &lt; 20%);</li> <li>■ Category 0: F 20% - (bioavailability 20%);</li> <li>■ The output value is the probability of being F 20%</li> </ul>          |
| F30%                   | 0.05  | 0.03  | 0.02  | <p>+</p> <ul style="list-style-type: none"> <li>■ 30% Bioavailability</li> <li>■ Category 1: F 30% + (bioavailability &lt; 30%);</li> <li>■ Category 0: F 30% - (bioavailability 30%);</li> <li>■ The output value is the probability of being F 30%</li> </ul> |
| F50%                   | 0.11  | 0.08  | 0.06  | <p>+</p> <ul style="list-style-type: none"> <li>■ 50% Bioavailability</li> <li>■ Category 1: F 50% + (bioavailability &lt; 50%);</li> <li>■ Category 0: F 50% - (bioavailability 50%);</li> <li>■ The output value is the probability of being F 50%</li> </ul> |
| <b>4. Distribution</b> |       |       |       |                                                                                                                                                                                                                                                                 |
| PPB                    | 99.04 | 95.68 | 98.71 | <ul style="list-style-type: none"> <li>■ Plasma Protein Binding</li> <li>Optimal: &lt; 90%.</li> <li>■ Drugs with high protein-bound may have a low therapeutic index.</li> </ul>                                                                               |
| VDss                   | -0.78 | -0.64 | -0.68 | <ul style="list-style-type: none"> <li>■ Volume Distribution</li> <li>■ Optimal: 0.04-20L/kg</li> <li>■ Blood-Brain Barrier Penetration</li> </ul>                                                                                                              |
| BBB                    | 0.07  | 0.01  | 0.03  | <ul style="list-style-type: none"> <li>■ Category 1: BBB+; Category 0: BBB-;</li> <li>■ The output value is the probability of being BBB+</li> </ul>                                                                                                            |

|                   |      |      |      |                                                                                                                                                                                                       |
|-------------------|------|------|------|-------------------------------------------------------------------------------------------------------------------------------------------------------------------------------------------------------|
| Fu                | 0.80 | 3.31 | 1.01 | <ul style="list-style-type: none"> <li>■ The fraction unbound in plasms</li> <li>■ Low: &lt;5%; Middle: 5~20%; High: &gt; 20%</li> <li>■ Category 0: Non-inhibitor; Category 1: inhibitor.</li> </ul> |
| OATP1B1 inhibitor | 0.64 | 0.81 | 0.84 | <ul style="list-style-type: none"> <li>■ The output value is the probability of being inhibitor, within the range of 0 to 1.</li> <li>■ Category 0: Non-inhibitor; Category 1: inhibitor.</li> </ul>  |
| OATP1B3 inhibitor | 0.71 | 0.92 | 0.68 | <ul style="list-style-type: none"> <li>■ The output value is the probability of being inhibitor, within the range of 0 to 1.</li> <li>■ Category 0: Non-inhibitor; Category 1: inhibitor.</li> </ul>  |
| BCRP inhibitor    | 0.04 | 0.02 | 0.01 | <ul style="list-style-type: none"> <li>■ The output value is the probability of being inhibitor, within the range of 0 to 1.</li> <li>■ Category 0: Non-inhibitor; Category 1: inhibitor.</li> </ul>  |
| MRP1 inhibitor    | 0.92 | 0.94 | 0.96 | <ul style="list-style-type: none"> <li>■ The output value is the probability of being inhibitor, within the range of 0 to 1.</li> </ul>                                                               |

### 5. Metabolism

|                   |      |       |      |                                                                                                                                                                          |
|-------------------|------|-------|------|--------------------------------------------------------------------------------------------------------------------------------------------------------------------------|
| CYP1A2 inhibitor  | 0.01 | 0.76  | 0.05 | <ul style="list-style-type: none"> <li>■ Category 1: Inhibitor; Category 0: Non-inhibitor;</li> <li>■ The output value is the probability of being inhibitor.</li> </ul> |
| CYP1A2 substrate  | 0.01 | 0.001 | 0.03 | <ul style="list-style-type: none"> <li>■ Category 1: Substrate; Category 0: Non-substrate;</li> <li>■ The output value is the probability of being substrate.</li> </ul> |
| CYP2C19 inhibitor | 0.01 | 0.96  | 0.04 | <ul style="list-style-type: none"> <li>■ Category 1: Inhibitor; Category 0: Non-inhibitor;</li> <li>■ The output value is the probability of being inhibitor.</li> </ul> |
| CYP2C19 substrate | 0.0  | 0.0   | 0.0  | <ul style="list-style-type: none"> <li>■ Category 1: Substrate; Category 0: Non-substrate;</li> <li>■ The output value is the probability of being substrate.</li> </ul> |
| CYP2C9 inhibitor  | 0.84 | 0.92  | 0.93 | <ul style="list-style-type: none"> <li>■ Category 1: Inhibitor; Category 0: Non-inhibitor;</li> <li>■ The output value is the probability of being inhibitor.</li> </ul> |
| CYP2C9 substrate  | 0.07 | 0.0   | 0.06 | <ul style="list-style-type: none"> <li>■ Category 1: Substrate; Category 0: Non-substrate;</li> </ul>                                                                    |

|                  |      |      |      |                                                                                                                                                                                                                                                                                                                                                                              |
|------------------|------|------|------|------------------------------------------------------------------------------------------------------------------------------------------------------------------------------------------------------------------------------------------------------------------------------------------------------------------------------------------------------------------------------|
| CYP2D6 inhibitor | 0.0  | 0.0  | 0.0  | <ul style="list-style-type: none"> <li>■ The output value is the probability of being substrate.</li> <li>■ Category 1: Inhibitor; Category 0: Non-inhibitor;</li> </ul>                                                                                                                                                                                                     |
| CYP2D6 substrate | 0.0  | 0.0  | 0.0  | <ul style="list-style-type: none"> <li>■ The output value is the probability of being inhibitor.</li> <li>■ Category 1: Substrate; Category 0: Non-substrate;</li> <li>■ The output value is the probability of being substrate.</li> </ul>                                                                                                                                  |
| CYP3A4 inhibitor | 0.01 | 0.0  | 0.07 | <ul style="list-style-type: none"> <li>■ Category 1: Inhibitor; Category 0: Non-inhibitor;</li> <li>■ The output value is the probability of being inhibitor.</li> </ul>                                                                                                                                                                                                     |
| CYP3A4 substrate | 0.0  | 0.0  | 0.0  | <ul style="list-style-type: none"> <li>■ Category 1: Substrate; Category 0: Non-substrate;</li> <li>■ The output value is the probability of being substrate.</li> </ul>                                                                                                                                                                                                     |
| CYP2B6 inhibitor | 0.16 | 0.0  | 0.10 | <ul style="list-style-type: none"> <li>■ Category 1: Inhibitor; Category 0: Non-inhibitor;</li> <li>■ The output value is the probability of being inhibitor.</li> </ul>                                                                                                                                                                                                     |
| CYP2B6 substrate | 0.0  | 0.0  | 0.0  | <ul style="list-style-type: none"> <li>■ Category 1: Substrate; Category 0: Non-substrate;</li> <li>■ The output value is the probability of being substrate.</li> </ul>                                                                                                                                                                                                     |
| CYP2C8 inhibitor | 0.80 | 1.0  | 1.0  | <ul style="list-style-type: none"> <li>■ Category 1: Inhibitor; Category 0: Non-inhibitor;</li> <li>■ The output value is the probability of being inhibitor.</li> </ul>                                                                                                                                                                                                     |
| HLM Stability    | 0.26 | 0.90 | 0.34 | <ul style="list-style-type: none"> <li>■ human liver microsomal (HLM) stability</li> <li>■ Category 0: stable+ (HLM &gt; 30 min); Category 1: unstable- (HLM ≤ 30 min).</li> <li>The output value is the probability of human liver microsomal instability, where a value closer to 1 indicates a higher likelihood of instability. The range is between 0 and 1.</li> </ul> |

**6. Excretion**

|                      |      |      |      |                                                                                                                                                                                                                                |
|----------------------|------|------|------|--------------------------------------------------------------------------------------------------------------------------------------------------------------------------------------------------------------------------------|
| CL <sub>plasma</sub> | 1.63 | 1.88 | 1.70 | <ul style="list-style-type: none"> <li>■ The unit of predicted CL<sub>plasma</sub> penetration is ml/min/kg. &gt;15 ml/min/kg: high clearance; 5-15 ml/min/kg: moderate clearance; &lt; 5 ml/min/kg: low clearance.</li> </ul> |
| T <sub>1/2</sub>     | 1.42 | 1.32 | 1.31 | <ul style="list-style-type: none"> <li>■ The unit of predicted T<sub>1/2</sub> is hours.</li> </ul>                                                                                                                            |

■ ultra-short half-life drugs:  $T_{1/2} < 1$  hour; short half-life drugs:  $T_{1/2}$  between 1-4 hours; intermediate short half-life drugs:  $T_{1/2}$  between 4-8 hours; long half-life drugs:  $T_{1/2} > 8$  hours.

**7. Toxicity**

|                         |      |      |      |                                                                                                                                                                                                                                                                                                                                                                                                                                                                                                                                                                                                                                                                                                                                                                                                         |
|-------------------------|------|------|------|---------------------------------------------------------------------------------------------------------------------------------------------------------------------------------------------------------------------------------------------------------------------------------------------------------------------------------------------------------------------------------------------------------------------------------------------------------------------------------------------------------------------------------------------------------------------------------------------------------------------------------------------------------------------------------------------------------------------------------------------------------------------------------------------------------|
| hERG Blockers           | 0.09 | 0.10 | 0.10 | <p>           ■ Molecules with <math>IC_{50} \leq 10 \text{ nM}</math> or 50% inhibition at <math>10 \text{ nM}</math> were classified as hERG+ (Category 1), while molecules with <math>IC_{50} &gt; 10 \text{ nM}</math> or <math>&lt; 50\%</math> inhibition at <math>10 \text{ nM}</math> were classified as hERG - (Category 0).         </p> <p>           ■ The output value is the probability of being hERG+, within the range of 0 to 1.         </p> <p>           ■ Molecules with <math>IC_{50} \leq 10 \text{ nM}</math> are classified as hERG+ (Category 1), and molecules with <math>IC_{50} &gt; 10 \text{ nM}</math> are classified as hERG- (Category 0).         </p> <p>           ■ The output value is the probability of being hERG+, within the range of 0 to 1.         </p> |
| hERG Blockers (10um)    | 0.10 | 0.07 | 0.10 | <p>           ■ Drug Induced Liver Injury.         </p> <p>           ■ Category 1: drugs with a high risk of DILI;         </p> <p>           ■ Category 0: drugs with no risk of DILI.         </p> <p>           ■ The output value is the probability of being toxic.         </p>                                                                                                                                                                                                                                                                                                                                                                                                                                                                                                                  |
| DILI                    | 0.98 | 0.99 | 0.98 | <p>           ■ AMES Toxicity         </p> <p>           ■ Category 1: Ames positive(+);         </p> <p>           ■ Category 0: Ames negative(-);         </p> <p>           ■ The output value is the probability of being toxic.         </p>                                                                                                                                                                                                                                                                                                                                                                                                                                                                                                                                                       |
| AMES Muta genicity      | 0.25 | 0.42 | 0.24 | <p>           ■ Rat Oral Acute Toxicity.         </p> <p>           ■ Category 0: low-toxicity, <math>&gt; 500 \text{ mg/kg}</math>;         </p> <p>           ■ Category 1: high-toxicity; <math>&lt; 500 \text{ mg/kg}</math>.         </p> <p>           ■ The output value is the probability of being toxic, within the range of 0 to 1.         </p>                                                                                                                                                                                                                                                                                                                                                                                                                                             |
| Rat Oral Acute Toxicity | 0.48 | 0.43 | 0.43 | <p>           ■ FDA Maximum (Recommended) Daily Dose.         </p> <p>           ■ Category 1: FDAMDD (+);         </p> <p>           ■ Category 0: FDAMDD (-);         </p>                                                                                                                                                                                                                                                                                                                                                                                                                                                                                                                                                                                                                            |
| FDAMDD                  | 0.32 | 0.30 | 0.30 |                                                                                                                                                                                                                                                                                                                                                                                                                                                                                                                                                                                                                                                                                                                                                                                                         |

|                             |      |      |      |                                                                                                                                                                                                                                                       |
|-----------------------------|------|------|------|-------------------------------------------------------------------------------------------------------------------------------------------------------------------------------------------------------------------------------------------------------|
|                             |      |      |      | <p>The output value is the probability of being positive.</p> <ul style="list-style-type: none"> <li>■ Category 1: Sensitizer;</li> <li>■ Category 0: Non-sensitizer.</li> </ul>                                                                      |
| Skin Sensitization          | 0.30 | 0.13 | 0.34 | <ul style="list-style-type: none"> <li>■ The output value is the probability of being toxic, within the range of 0 to 1.</li> </ul>                                                                                                                   |
| Carcinogenicity             | 0.60 | 0.75 | 0.62 | <ul style="list-style-type: none"> <li>■ Category 1: carcinogens;</li> <li>■ Category 0: non-carcinogens;</li> </ul>                                                                                                                                  |
| Eye Corrosion               | 0.0  | 0.0  | 0.0  | <p>■ The output value is the probability of being toxic.</p> <ul style="list-style-type: none"> <li>■ Eye Corrosion</li> <li>■ Category 1: corrosives; Category 0: noncorrosives;</li> </ul>                                                          |
| Eye Irritation              | 0.63 | 0.59 | 0.66 | <ul style="list-style-type: none"> <li>■ The output value is the probability of being corrosives.</li> <li>■ Eye Irritation</li> <li>■ Category 1: irritants; Category 0: nonirritants;</li> </ul>                                                    |
| Respiratory                 | 0.71 | 0.78 | 0.70 | <ul style="list-style-type: none"> <li>■ The output value is the probability of being irritants.</li> <li>■ Category 1: respiratory toxicants;</li> <li>■ Category 0: non-respiratory toxicants.</li> </ul>                                           |
| Human Hepatotoxicity        | 0.71 | 0.74 | 0.71 | <ul style="list-style-type: none"> <li>■ The output value is the probability of being toxic, within the range of 0 to 1.</li> <li>■ Human Hepatotoxicity</li> <li>■ Category 1: H-HT positive(+);</li> <li>■ Category 0: H-HT negative(-);</li> </ul> |
| Drug-induced Nephrotoxicity | 0.77 | 0.82 | 0.79 | <ul style="list-style-type: none"> <li>■ The output value is the probability of being toxic.</li> <li>■ Category 0: non-nephrotoxic (-);</li> <li>■ Category 1: nephrotoxic (+).</li> </ul>                                                           |
| Ototoxicity                 | 0.59 | 0.73 | 0.64 | <ul style="list-style-type: none"> <li>■ The output value is the probability of being nephrotoxic (+), within the range of 0 to 1.</li> <li>■ Category 0: non-ototoxicity (-);</li> <li>■ Category 1: ototoxicity (+).</li> </ul>                     |
| Hematotoxicity              | 0.43 | 0.60 | 0.47 | <ul style="list-style-type: none"> <li>■ The output value is the probability of being ototoxicity (+), within the range of 0 to 1.</li> <li>■ Category 0: non-hematotoxicity (-);</li> <li>■ Category 1: hematotoxicity (+).</li> </ul>               |
| Genotoxicity                | 0.91 | 0.97 | 0.87 | <ul style="list-style-type: none"> <li>■ The output value is the probability of being hematotoxicity (+), within the range of 0 to 1.</li> <li>■ Category 0: non-Genotoxicity (-);</li> <li>■ Category 1: Genotoxicity (+).</li> </ul>                |

|                             |      |      |      |                                                                                                                                                                                                                                     |
|-----------------------------|------|------|------|-------------------------------------------------------------------------------------------------------------------------------------------------------------------------------------------------------------------------------------|
| RPMI-8226<br>Immunitoxicity | 0.03 | 0.07 | 0.03 | <ul style="list-style-type: none"> <li>■ The output value is the probability of being ototoxicity (+), within the range of 0 to 1.</li> <li>■ Category 0: non-cytotoxicity (-);</li> <li>■ Category 1: cytotoxicity (+).</li> </ul> |
| A549<br>Cytotoxicity        | 0.01 | 0.01 | 0.01 | <ul style="list-style-type: none"> <li>■ The output value is the probability of being ototoxicity (+), within the range of 0 to 1.</li> <li>■ Category 0: non-cytotoxicity (-);</li> <li>■ Category 1: cytotoxicity (+).</li> </ul> |
| Hek293<br>Cytotoxicity      | 0.06 | 0.07 | 0.05 | <ul style="list-style-type: none"> <li>■ The output value is the probability of being ototoxicity (+), within the range of 0 to 1.</li> <li>■ Category 0: non-cytotoxicity (-);</li> <li>■ Category 1: cytotoxicity (+).</li> </ul> |
| Drug-induced Neurotoxicity  | 0.75 | 0.72 | 0.78 | <ul style="list-style-type: none"> <li>■ The output value is the probability of being neurotoxic (+), within the range of 0 to 1.</li> <li>■ Category 0: non-neurotoxic (-);</li> <li>■ Category 1: neurotoxic (+).</li> </ul>      |

### 8. Environmental toxicity

|                          |      |      |      |                                                                                                                                                                                                                                                                                 |
|--------------------------|------|------|------|---------------------------------------------------------------------------------------------------------------------------------------------------------------------------------------------------------------------------------------------------------------------------------|
| Bioconcentration Factors | 0.18 | 0.08 | 0.18 | <ul style="list-style-type: none"> <li>■ Bioconcentration factors are used for considering secondary poisoning potential and assessing risks to human health via the food chain.</li> <li>■ The unit is <math>\log_{10}[(\text{mg/L})/(1000 \cdot \text{MW})]</math></li> </ul> |
| IGC50                    | 2.87 | 2.69 | 2.87 | <ul style="list-style-type: none"> <li>■ Tetrahymena pyriformis 50 percent growth inhibition concentration.</li> <li>■ The unit is <math>\log_{10}[(\text{mg/L})/(1000 \cdot \text{MW})]</math></li> </ul>                                                                      |
| LC50FM                   | 3.36 | 3.27 | 3.36 | <ul style="list-style-type: none"> <li>■ 96-hour fathead minnow 50 percent lethal concentration.</li> <li>■ The unit is <math>\log_{10}[(\text{mg/L})/(1000 \cdot \text{MW})]</math></li> </ul>                                                                                 |
| LC50DM                   | 3.90 | 3.89 | 3.94 | <ul style="list-style-type: none"> <li>■ 48-hour daphnia magna 50 percent lethal concentration.</li> <li>■ The unit is <math>\log_{10}[(\text{mg/L})/(1000 \cdot \text{MW})]</math></li> </ul>                                                                                  |

### 9. Tox21 pathway

|        |      |      |      |                                                                                                                                                  |
|--------|------|------|------|--------------------------------------------------------------------------------------------------------------------------------------------------|
| NR-AhR | 0.63 | 0.54 | 0.72 | <ul style="list-style-type: none"> <li>■ Aryl hydrocarbon receptor</li> <li>■ Category 1: actives ;</li> <li>■ Category 0: inactives;</li> </ul> |
|--------|------|------|------|--------------------------------------------------------------------------------------------------------------------------------------------------|



|               |      |      |      |                                                                                                                                                                                                                                                                                                                             |
|---------------|------|------|------|-----------------------------------------------------------------------------------------------------------------------------------------------------------------------------------------------------------------------------------------------------------------------------------------------------------------------------|
| NR-AR         | 0.09 | 0.09 | 0.11 | <ul style="list-style-type: none"> <li>■ The output value is the probability of being active.</li> <li>■ Androgen receptor</li> <li>■ Category 1: actives ;</li> <li>■ Category 0: inactives;</li> <li>■ The output value is the probability of being active.</li> <li>■ Androgen receptor ligand-binding domain</li> </ul> |
| NR-AR-LBD     | 0.01 | 0.0  | 0.0  | <ul style="list-style-type: none"> <li>■ Category 1: actives ;</li> <li>■ Category 0: inactives;</li> <li>■ The output value is the probability of being active.</li> </ul>                                                                                                                                                 |
| NR-Aromatase  | 0.16 | 0.02 | 0.04 | <ul style="list-style-type: none"> <li>■ Category 1: actives ;</li> <li>■ Category 0: inactives;</li> <li>■ The output value is the probability of being active.</li> </ul>                                                                                                                                                 |
| NR-ER         | 0.24 | 0.16 | 0.25 | <ul style="list-style-type: none"> <li>■ Estrogen receptor</li> <li>■ Category 1: actives ;</li> <li>■ Category 0: inactives;</li> <li>■ The output value is the probability of being active.</li> <li>■ Estrogen receptor ligand-binding domain</li> </ul>                                                                 |
| NR-ER-LBD     | 0.0  | 0.0  | 0.00 | <ul style="list-style-type: none"> <li>■ Category 1: actives ;</li> <li>■ Category 0: inactives;</li> <li>■ The output value is the probability of being active.</li> <li>■ Peroxisome proliferator-activated receptor gamma</li> </ul>                                                                                     |
| NR-PPAR-gamma | 0.23 | 0.03 | 0.08 | <ul style="list-style-type: none"> <li>■ Category 1: actives ;</li> <li>■ Category 0: inactives;</li> <li>■ The output value is the probability of being active.</li> <li>■ Antioxidant response element</li> </ul>                                                                                                         |
| SR-ARE        | 0.64 | 0.21 | 0.38 | <ul style="list-style-type: none"> <li>■ Category 1: actives ;</li> <li>■ Category 0: inactives;</li> <li>■ The output value is the probability of being active.</li> <li>■ ATPase family AAA domain-containing protein 5</li> </ul>                                                                                        |
| SR-ATAD5      | 0.05 | 0.03 | 0.05 | <ul style="list-style-type: none"> <li>■ Category 1: actives ;</li> <li>■ Category 0: inactives;</li> <li>■ The output value is the probability of being active.</li> </ul>                                                                                                                                                 |
| SR-HSE        | 0.15 | 0.02 | 0.11 | <ul style="list-style-type: none"> <li>■ Heat shock factor response element</li> </ul>                                                                                                                                                                                                                                      |

|        |      |      |      |                                                                                                                                                                                                                                                                                                                                                                                                       |
|--------|------|------|------|-------------------------------------------------------------------------------------------------------------------------------------------------------------------------------------------------------------------------------------------------------------------------------------------------------------------------------------------------------------------------------------------------------|
| SR-MMP | 0.49 | 0.08 | 0.12 | <ul style="list-style-type: none"> <li>■ Category 1: actives ;</li> <li>■ Category 0: inactives;</li> <li>■ The output value is the probability of being active.</li> <li>■ Mitochondrial membrane potential</li> <li>■ Category 1: actives ;</li> <li>■ Category 0: inactives;</li> <li>■ The output value is the probability of being active.</li> <li>■ p53, a tumor suppressor protein</li> </ul> |
| SR-p53 | 0.06 | 0.02 | 0.03 | <ul style="list-style-type: none"> <li>■ Category 1: actives ;</li> <li>■ Category 0: inactives;</li> <li>■ The output value is the probability of being active.</li> </ul>                                                                                                                                                                                                                           |

### 10. Toxicophore Rules

|                                   |          |                                                                                                                                  |
|-----------------------------------|----------|----------------------------------------------------------------------------------------------------------------------------------|
| Acute Toxicity Rule               | 0        | <ul style="list-style-type: none"> <li>■ 20 substructures;</li> <li>■ acute toxicity during oral administration</li> </ul>       |
| Genotoxic Carcinogenicity Rule    | 0        | <ul style="list-style-type: none"> <li>■ 117 substructures;</li> <li>■ carcinogenicity or mutagenicity</li> </ul>                |
| NonGenotoxic Carcinogenicity Rule | 0        | <ul style="list-style-type: none"> <li>■ 23 substructures;</li> <li>■ carcinogenicity through nongenotoxic mechanisms</li> </ul> |
| Skin Sensitization Rule           | 1 alerts | <ul style="list-style-type: none"> <li>■ 155 substructures;</li> <li>■ skin irritation</li> </ul>                                |
| Aquatic Toxicity Rule             | 0        | <ul style="list-style-type: none"> <li>■ 99 substructures;</li> <li>■ toxicity to liquid(water)</li> </ul>                       |
| NonBiodegradable Rule             | 1 alerts | <ul style="list-style-type: none"> <li>■ 19 substructures;</li> <li>■ non-biodegradable</li> </ul>                               |
| SureChEMBL Rule                   | 0        | <ul style="list-style-type: none"> <li>■ 164 substructures;</li> <li>■ MedChem unfriendly status</li> </ul>                      |
| Toxicophores Rule                 | 1 alerts | 154 toxic substructures from FAF-Drug4                                                                                           |
